# Supplementary material for: Avoiding Weight Gain in Cardiometabolic Disease: A Systematic Review
Source: Hindawi journal article supplement (doi:10.1155/2014/358919), 2014-01-01
Supplement: f1 [file 358919.f1.pdf]

## SUPPLEMENTAL MATERIAL

### Avoiding Weight Gain in Cardiometabolic Disease: A Systematic Review

Nisa M Maruthur, MD, MHS<sup>1,2,3</sup>

Kimberly Gudzone, MD, MPH<sup>1,2</sup>

Susan Hutfless, PhD<sup>4</sup>

Oluwakemi A Fawole, MBChB, MPH<sup>1</sup>

Renee F Wilson, MS<sup>5</sup>

Brandyn D Lau, MPH, CPH<sup>6</sup>

Cheryl A M Anderson, PhD<sup>2,3,7</sup>

Sara N Bleich, PhD<sup>5</sup>

Jodi Segal, MD, MPH<sup>1,5</sup>

Corresponding author: Nisa M. Maruthur, MD, MHS; 2024 E. Monument St., Suite 2-600, Baltimore, MD, 21287; telephone 410-502-8896, fax 410-955-0476; email: [maruthur@jhmi.edu](mailto:maruthur@jhmi.edu)

---

<sup>1</sup> Division of General Internal Medicine, Johns Hopkins University School of Medicine, Baltimore, Maryland

<sup>2</sup> Welch Center for Prevention, Epidemiology, and Clinical Research, Baltimore, Maryland

<sup>3</sup> Department of Epidemiology, Johns Hopkins University School of Medicine, Baltimore, Maryland

<sup>4</sup> Division of Gastroenterology, Johns Hopkins University School of Medicine, Baltimore, Maryland

<sup>5</sup> Department of Health Policy and Management, Johns Hopkins Bloomberg School of Public Health, Baltimore, Maryland

<sup>6</sup> Division of Acute Surgery, Department of Surgery, Johns Hopkins University School of Medicine, Baltimore, Maryland

<sup>7</sup> Department of Family and Preventive Medicine, University of California at San Diego, San Diego, California

## Supporting Tables

**Table S1.** Participant characteristics in studies of patients with or at risk for diabetes and cardiovascular disease

| Author, year                                                | Total N | Follow-up period | % Women                       | Mean Age, yrs                    | Race       | Education                      | % Current Smoking | Comments                                                                                                                                              |
|-------------------------------------------------------------|---------|------------------|-------------------------------|----------------------------------|------------|--------------------------------|-------------------|-------------------------------------------------------------------------------------------------------------------------------------------------------|
| Abraira, 1980 <sup>1</sup>                                  | 30      | 24 months        | 0                             | Arm 1: 49<br>Arm 2: 52           |            |                                |                   | Duration of diabetes in years<br>Arm1: mean : 11<br>Arm2: mean : 12<br>All participants on insulin                                                    |
| Anderssen, 1995 <sup>2</sup><br>Torjesen, 1997 <sup>3</sup> | 97      | 12 months        |                               |                                  |            |                                |                   |                                                                                                                                                       |
| Babazono, 2007 <sup>4</sup>                                 | 99      | Not reported     | Arm1: 51.1<br>Arm2: 58        | Arm1: 64.5<br>Arm2: 64.3         |            |                                |                   | ~30% with HTN at baseline in each group; 20% in intervention and 14.3% in control group with DM at baseline                                           |
| Clark, 2004 <sup>5</sup>                                    | 100     | Not reported     | Overall: 42                   | Overall: 59.5                    |            |                                |                   |                                                                                                                                                       |
| Gram, 2010 <sup>6</sup>                                     | 68      | Not reported     | Overall: n=31                 | Arm1: 61<br>Arm2: 59<br>Arm3: 62 |            |                                |                   | At baseline: statistically significant difference (P=0.04) for hip circumference (in cm):<br><br>Arm 1 Control: 114<br>Arm 2 EP: 111<br>Arm 3 NW: 107 |
| Kumanyika, 2005 <sup>7</sup>                                | 1159    | Not reported     | "approx two thirds were male" |                                  | Black: 17% | "about half" college graduates |                   |                                                                                                                                                       |
| Plotnikoff, 2011 <sup>8</sup>                               | 96      | 12 Months        | Overall: 60                   | Overall: 60 (25-78)              | NR         | Some post secondary: 65%       | NR                |                                                                                                                                                       |
| Razquin, 2009 <sup>9</sup>                                  | 187     | Not reported     | Arm1: 54                      | Arm1: 69                         |            |                                |                   |                                                                                                                                                       |

|                               |      |              |                                          |                                                                                     |                                        |                                                                                            |                                        |                                                                                                                                                                                                           |
|-------------------------------|------|--------------|------------------------------------------|-------------------------------------------------------------------------------------|----------------------------------------|--------------------------------------------------------------------------------------------|----------------------------------------|-----------------------------------------------------------------------------------------------------------------------------------------------------------------------------------------------------------|
|                               |      |              | Arm2: 52<br>Arm3: 46                     | Arm2: 67.48<br>Arm3: 68.40                                                          |                                        |                                                                                            |                                        |                                                                                                                                                                                                           |
| Razquin, 2010 <sup>10</sup>   | 737  | Not reported | Arm1: 57<br>Arm2: 56<br>Arm3: 52         | Arm1: 68.3<br>Arm2: 67.7<br>Arm3: 67.6                                              |                                        |                                                                                            | Arm1: 18<br>Arm2: 16<br>Arm3: 13       | Diabetes<br>Arm 1: 69%<br>Arm 2: 64%<br>Arm 3: 63%                                                                                                                                                        |
| Zazpe, 2008 <sup>11</sup>     | 1776 | Not reported | Arm1: 57.7<br>Arm2: 53.8<br>Arm3: 49     | Arm1: 68<br>Arm2: 67.2<br>Arm3: 67                                                  | Not reported                           | Less than high school<br>Arm1: 75.9%<br>Arm2: 76.0%<br>Arm3: 72.6%                         | Arm1: 16.9<br>Arm2: 19.5<br>Arm3: 19.0 | Diabetes<br>Arm1: 47.8%<br>Arm2: 51%<br>Arm3: 47.5%                                                                                                                                                       |
| Samaras, 1997 <sup>12</sup>   | 26   | 12 months    | Overall: n=16                            | Arm1: 60.5<br>Arm2: 60.5                                                            |                                        |                                                                                            |                                        | Excluded current smokers                                                                                                                                                                                  |
| Stefanick, 1998 <sup>13</sup> | 367  | Not reported | report characteristics stratified by sex | Arm1: 56.9<br>Arm2: 47.8<br><br>note this is stratified by sex and not intervention |                                        |                                                                                            |                                        | All characteristics and results stratified by sex                                                                                                                                                         |
| Toobert, 2011 <sup>14</sup>   | 280  | 6-12 months  | Overall: 100%                            | Arm 1: 58.7<br>Arm 2: 55.6<br><br>Age differs by group<br>P=0.009                   | Latina: 100%                           | HS diploma:<br>Arm 1: 27.1<br>Arm 2: 20<br><br>Some College:<br>Arm 1: 30.1<br>Arm 2: 28.6 | Arm 1: 12.6<br>Arm 2: 9.2              |                                                                                                                                                                                                           |
| Yates, 2010 <sup>15</sup>     | 74   | Not reported | Overall: 31                              | Overall: 65                                                                         | Asian/Pacific Islander overall: % : 26 |                                                                                            | Overall: 11                            | 49% were taking aspirin, 7% were taking non-steroidal anti-inflammatory medication, 58% were taking statins, 34% were taking beta-blockers, and 19% were taking angiotensin-converting enzyme inhibitors. |

**Table S2.** Risk of bias in included studies

|                               | QUESTION* |   |   |   |   |   |   |   |   |   |                   |    |    |                        |    |    |    |    |    |                                                  |    |    |    |    |    |       |    |    |   |
|-------------------------------|-----------|---|---|---|---|---|---|---|---|---|-------------------|----|----|------------------------|----|----|----|----|----|--------------------------------------------------|----|----|----|----|----|-------|----|----|---|
|                               | Reporting |   |   |   |   |   |   |   |   |   | External validity |    |    | Internal Validity-bias |    |    |    |    |    | Internal Validity-confounding and selection bias |    |    |    |    |    | Power |    |    |   |
|                               | N         | 1 | 2 | 3 | 4 | 5 | 6 | 7 | 8 | 9 | 10                | 11 | 12 | 13                     | 14 | 15 | 16 | 17 | 18 | 19                                               | 20 | 21 | 22 | 23 | 24 | 25    | 26 | 27 |   |
| <b>Self Management</b>        |           |   |   |   |   |   |   |   |   |   |                   |    |    |                        |    |    |    |    |    |                                                  |    |    |    |    |    |       |    |    |   |
| Clark, 2004 <sup>5</sup>      | 100       | Y | N | N | N | Y | N | N | N | Y | Y                 | U  | U  | N                      | U  | U  | N  | Y  | Y  | Y                                                | Y  | Y  | Y  | U  | N  | Y     | N  | Y  |   |
| Plotnikoff, 2011 <sup>8</sup> | 96        | Y | Y | Y | Y | Y | Y | N | N | N | U                 | U  | Y  | U                      | U  | U  | U  | Y  | U  | Y                                                | Y  | Y  | Y  | U  | Y  | N     | Y  | Y  |   |
| <b>Diet</b>                   |           |   |   |   |   |   |   |   |   |   |                   |    |    |                        |    |    |    |    |    |                                                  |    |    |    |    |    |       |    |    |   |
| Abraira, 1980 <sup>1</sup>    | 30        | Y | Y | Y | Y | P | N | Y | Y | N | N                 | U  | U  | Y                      | N  | N  | U  | N  | Y  | Y                                                | Y  | Y  | Y  | N  | N  | N     | U  | N  |   |
| Razquin, 2010 <sup>10</sup>   | 737       | Y | Y | Y | Y | Y | Y | Y | Y | N | Y                 | U  | U  | U                      | U  | U  | U  | N  | Y  | Y                                                | Y  | Y  | U  | Y  | Y  | Y     | N  | N  |   |
| Razquin, 2009 <sup>9</sup>    | 187       | Y | Y | Y | Y | P | Y | Y | Y | N | N                 | U  | U  | U                      | N  | U  | U  | N  | Y  | N                                                | Y  | Y  | U  | Y  | Y  | N     | N  | N  |   |
| <b>Exercise</b>               |           |   |   |   |   |   |   |   |   |   |                   |    |    |                        |    |    |    |    |    |                                                  |    |    |    |    |    |       |    |    |   |
| Yates, 2010 <sup>15</sup>     | 74        | Y | Y | Y | Y | P | Y | Y | N | Y | Y                 | U  | U  | U                      | U  | U  | Y  | Y  | Y  | Y                                                | U  | Y  | Y  | Y  | Y  | U     | N  | N  | N |
| Torjesen, 1997 <sup>3</sup>   | 219       | Y | Y | N | Y | P | Y | Y | N | Y | N                 | U  | U  | N                      | N  | N  | U  | N  | Y  | Y                                                | Y  | Y  | Y  | Y  | U  | N     | N  | N  |   |
| <b>Combination</b>            |           |   |   |   |   |   |   |   |   |   |                   |    |    |                        |    |    |    |    |    |                                                  |    |    |    |    |    |       |    |    |   |
| Kumanyika, 2005 <sup>7</sup>  | 115<br>9  | Y | Y | Y | Y | Y | Y | Y | N | N | N                 | U  | U  | U                      | N  | Y  | N  | N  | Y  | Y                                                | Y  | Y  | Y  | Y  | Y  | Y     | Y  | U  | Y |
| Samaras, 1997 <sup>12</sup>   | 26        | Y | Y | Y | Y | Y | N | Y | N | N | N                 | U  | U  | Y                      | U  | U  | Y  | N  | Y  | Y                                                | Y  | Y  | U  | Y  | U  | N     | U  | N  |   |
| Stefanick, 1998 <sup>13</sup> | 367       | Y | Y | Y | Y | P | Y | Y | N | Y | Y                 | U  | U  | U                      | N  | U  | Y  | U  | Y  | U                                                | Y  | U  | U  | Y  | U  | U     | Y  | N  |   |
| Babazono, 2007 <sup>4</sup>   | 99        | Y | Y | Y | Y | P | Y | Y | N | N | N                 | Y  | U  | Y                      | N  | U  | U  | N  | Y  | N                                                | Y  | Y  | Y  | Y  | U  | N     | N  | N  |   |
| Toobert, 2011 <sup>14</sup>   | 280       | Y | Y | Y | Y | Y | Y | N | Y | Y | U                 | N  | Y  | N                      | U  | Y  | U  | Y  | N  | Y                                                | Y  | Y  | Y  | U  | Y  | Y     | N  | Y  |   |
| Gram, 2010 <sup>16</sup>      | 68        | Y | Y | Y | Y | Y | Y | Y | Y | N | N                 | U  | U  | U                      | U  | U  | U  | N  | Y  | Y                                                | Y  | Y  | U  | Y  | U  | Y     | Y  | Y  |   |

**Table S3.** Strength of evidence of studies among adults with or at risk for cardiovascular disease or diabetes mellitus

| Number of Studies,<br>Participants | Domains Pertaining to Strength of Evidence                                                                     |                                                                                |                                                     |                                                           | Strength of evidence<br><br>Range of between-<br>group mean difference<br>if available (reference =<br>control) |
|------------------------------------|----------------------------------------------------------------------------------------------------------------|--------------------------------------------------------------------------------|-----------------------------------------------------|-----------------------------------------------------------|-----------------------------------------------------------------------------------------------------------------|
| BMI change                         |                                                                                                                |                                                                                |                                                     |                                                           |                                                                                                                 |
| Self-Management<br>interventions   | Risk of Bias                                                                                                   | Consistency                                                                    | Directness                                          | Precision                                                 |                                                                                                                 |
| 2 RCTs<br><br>196                  | Moderate based on lack<br>of reporting on masking<br>of outcome assessors and<br>lack of adequate<br>reporting | Consistent                                                                     | Indirect (weight<br>maintenance not stated<br>goal) | Imprecise based on lack<br>of reporting on<br>variability | Low<br><br>Range: -1.76 kg/m <sup>2</sup>                                                                       |
| Diet interventions                 | Risk of Bias                                                                                                   | Consistency                                                                    | Directness                                          | Precision                                                 |                                                                                                                 |
| 1 RCT<br><br>1551                  | Moderate based on lack<br>of reporting on masking<br>and lack of internal<br>validity based on q14-27          | Not applicable (one<br>study)                                                  | Indirect (weight<br>maintenance not stated<br>goal) | Imprecise (no measure<br>of variability)                  | Low<br><br>Range: not available                                                                                 |
| Physical activity<br>interventions | Risk of Bias                                                                                                   | Consistency                                                                    | Directness                                          | Precision                                                 |                                                                                                                 |
| 2 controlled trials<br><br>166     | Moderate based on lack<br>of reporting on masking<br>of outcome assessors and<br>completers analysis for 1     | Inconsistent (based on<br>different signs for<br>between group<br>differences) | Indirect                                            | Imprecise                                                 | Low<br><br>Range: -0.2 to -0.7<br>kg/m <sup>2</sup>                                                             |

|                                |                                                                                                            |              |                                                                                 |                                                                                               |                                                |
|--------------------------------|------------------------------------------------------------------------------------------------------------|--------------|---------------------------------------------------------------------------------|-----------------------------------------------------------------------------------------------|------------------------------------------------|
|                                | study                                                                                                      |              |                                                                                 |                                                                                               |                                                |
| Combination interventions      | Risk of Bias                                                                                               | Consistency  | Directness                                                                      | Precision                                                                                     |                                                |
| 4 RCTs<br>384                  | Moderate based on lack of reporting on masking and lack of internal validity based on q14-27               | Consistent   | Indirect (weight maintenance not stated goal)                                   | Imprecise based on lack of reporting on variability and width of CI > 0.8 units when provided | Low<br>Range: -0.39 to -0.71 kg/m <sup>2</sup> |
| Weight change                  |                                                                                                            |              |                                                                                 |                                                                                               |                                                |
| Diet intervention              | Risk of Bias                                                                                               | Consistency  | Directness                                                                      | Precision                                                                                     |                                                |
| 2 controlled trials<br>767     | High based on lack of randomization, lack of reporting on masking, and lack of internal validity by q14-27 | Consistent   | Indirect (weight maintenance not stated goal in one study but was in the other) | Imprecise (don't have enough measures of variability)                                         | Low<br>Range: -0.11 to -0.84 kg                |
| Physical activity intervention | Risk of Bias                                                                                               | Consistency  | Directness                                                                      | Precision                                                                                     |                                                |
| 2 controlled trials<br>166     | Moderate based on lack of reporting on masking of outcome assessors and completers analysis for 1 study    | Inconsistent | Indirect                                                                        | Imprecise (on cusp with one study being imprecise and one not based on 2.5 kg width of CI)    | Low<br>Range: -0.3 to -2.0 kg                  |
| Combination intervention       | Risk of Bias                                                                                               | Consistency  | Directness                                                                      | Precision                                                                                     |                                                |
| 4 controlled trials            | Moderate based on lack                                                                                     | Consistent   | Indirect                                                                        | Imprecise                                                                                     | Low                                            |

|                                |                                                                                                    |                            |                                               |                                                                                          |                                 |
|--------------------------------|----------------------------------------------------------------------------------------------------|----------------------------|-----------------------------------------------|------------------------------------------------------------------------------------------|---------------------------------|
| 1719                           | of masking                                                                                         |                            |                                               |                                                                                          | Range: -0.1 to -1.26 kg         |
| Waist circumference            |                                                                                                    |                            |                                               |                                                                                          |                                 |
| Self-Management interventions  | Risk of Bias                                                                                       | Consistency                | Directness                                    | Precision                                                                                |                                 |
| 2 RCTs<br>196                  | Moderate based on lack of reporting on masking of outcome assessors and lack of adequate reporting | Consistent                 | Indirect (weight maintenance not stated goal) | Imprecise based on lack of reporting on variability and width of CI > 2 cm when provided | Low<br>Range: -3.87 cm          |
| Diet intervention              | Risk of Bias                                                                                       | Consistency                | Directness                                    | Precision                                                                                |                                 |
| 1 controlled trial<br>187      | Moderate based on lack of reporting on masking of outcome assessors and lack of adequate reporting | Not applicable (one study) | Indirect (weight maintenance not stated goal) | Imprecise based on CI >2cm                                                               | Low<br>Range: -0.34 to -0.74 cm |
| Physical activity intervention | Risk of Bias                                                                                       | Consistency                | Directness                                    | Precision                                                                                |                                 |
| 1 controlled trial<br>92       | Moderate risk of bias based on lack of masking of outcome assessors                                | Not applicable (one study) | Indirect                                      | Imprecise                                                                                | Low<br>Range: -2.8 cm           |
| Combination intervention       | Risk of Bias                                                                                       | Consistency                | Directness                                    | Precision                                                                                |                                 |
| 1 RCT<br>68                    | Moderate risk of bias based on lack of reporting on masking of                                     | Not applicable (one study) | Indirect                                      | Imprecise                                                                                | Low<br>Range: -2.38 cm          |

|                                |                                                                                              |                                                                        |                                               |                   |                             |
|--------------------------------|----------------------------------------------------------------------------------------------|------------------------------------------------------------------------|-----------------------------------------------|-------------------|-----------------------------|
|                                | outcome assessors                                                                            |                                                                        |                                               |                   |                             |
| Adherence                      |                                                                                              |                                                                        |                                               |                   |                             |
| Physical activity intervention | Risk of Bias                                                                                 | Consistency                                                            | Directness                                    | Precision         |                             |
| 1 controlled trial<br>92       | Moderate risk of bias based on lack of masking of outcome assessors                          | Not applicable (one study)                                             | Indirect                                      | Imprecise (N<400) | Low<br>Range: 57%           |
| Combination                    |                                                                                              |                                                                        |                                               |                   |                             |
| 3 RCT<br>191                   | Moderate based on lack of reporting on masking and lack of internal validity based on q14-27 | Inconsistent (by magnitude since is adherence, sign is not applicable) | Indirect (weight maintenance not stated goal) | Imprecise (N<400) | Low<br>Range: 46% to 100%   |
| Functional Status              |                                                                                              |                                                                        |                                               |                   |                             |
| Combination intervention       | Risk of Bias                                                                                 | Consistency                                                            | Directness                                    | Precision         |                             |
| 1 controlled trial<br>68       | Moderate risk of bias based on lack of masking of outcome assessors                          | Not applicable (one study)                                             | Indirect                                      | Imprecise         | Low<br>Range: Not available |



**Table S4.** Waist circumference results in studies of populations with or at risk for diabetes and cardiovascular disease

| Author, yr<br>Arm                                    | Baseline<br>N | Baseline waist<br>circumference (SD),<br>cm | 12 mo N | Waist circumference at<br>12 months (SD), cm | Change from baseline at 12<br>mo, cm                | Between-group difference<br>at 12 months (95% CI), cm |
|------------------------------------------------------|---------------|---------------------------------------------|---------|----------------------------------------------|-----------------------------------------------------|-------------------------------------------------------|
| <b>Self-management intervention</b>                  |               |                                             |         |                                              |                                                     |                                                       |
| <b>Clark, 2004<sup>5</sup></b>                       |               |                                             |         |                                              |                                                     |                                                       |
| Usual care                                           | 50            | 101.25 (11.4)                               | NR      | 103.6 (10.63)                                | 2.35, P=0.001                                       | reference                                             |
| Goal-setting - diet and physical activity            | 50            | 104.22 (10.46)                              | NR      | 102.7 (10.25)                                | -1.52, P=0.002                                      | -3.87 (-2.1 to 9.9)                                   |
| <b>Plotnikoff, 2011<sup>8</sup></b>                  |               |                                             |         |                                              |                                                     |                                                       |
| Diabetes education                                   | 49            | 110.4 (12.7)                                | 49      |                                              | -3.2 <sup>a</sup> , P<0.01                          | P>0.01                                                |
| Diabetes education + physical activity<br>supplement | 47            | 111.8 (16.7)                                | 47      |                                              | -5.2 <sup>a</sup> , P<0.01                          |                                                       |
| <b>Physical activity intervention<sup>17</sup></b>   |               |                                             |         |                                              |                                                     |                                                       |
| <b>Anderssen, 1995<sup>2</sup></b>                   |               |                                             |         |                                              |                                                     |                                                       |
| Usual care                                           | 43            | 102.3 (SE: 1.4)                             | 43      | 103.2                                        | 0.9 (SE: 0.4)                                       |                                                       |
| Endurance exercise                                   | 52            | 102.6 (SE: 1.4)                             | 52      | 100.7                                        | -1.9 (SE: 0.6)                                      | -2.8, P<0.05                                          |
| <b>Diet interventions</b>                            |               |                                             |         |                                              |                                                     |                                                       |
| <b>Razquin, 2009<sup>9b</sup></b>                    |               |                                             |         |                                              |                                                     |                                                       |
| Minimal intervention                                 | 59            | 93.79 (9.78)                                |         |                                              |                                                     |                                                       |
| Mediterranean diet - Virgin olive oil                | 65            | 98.83 (10.14)                               |         |                                              |                                                     |                                                       |
| Mediterranean diet - Mixed nuts                      | 63            | 96.67 (9.30)                                |         |                                              |                                                     |                                                       |
| <b>Combination interventions</b>                     |               |                                             |         |                                              |                                                     |                                                       |
| <b>Gram, 2010<sup>6</sup></b>                        |               |                                             |         |                                              |                                                     |                                                       |
| Minimal intervention                                 | 22            | 113 (10)                                    | 20      | 112 (SE: 2)                                  |                                                     |                                                       |
| Self-mgmt + aerobic exercise + strength<br>training  | 24            | 110 (10)                                    | 24      | 108 (SE: 2)                                  | -2.38 (95% CI: -4.73 to -0.03; SE:<br>1.2; P=0.012) |                                                       |
| Self-mgmt + Nordic walking                           | 22            | 109 (11)                                    | 21      | 108 (SE: 2)                                  | -1.62 (95% CI: -3.76 to 0.52; SE:<br>1.1)           |                                                       |

<sup>a</sup> Adjusted but covariates unclear

<sup>b</sup> Results at 36 months: Minimal intervention, n=59, mean change from baseline (SD), 0.11 (4.56) cm; Mediterranean - virgin olive oil, n=65, mean change from baseline (SD), -0.63 (4.76), Mediterranean – mixed nuts, n=63, mean change from baseline (SD), -0.23 (3.60) cm

**Table S5.** Effects of self management, diet, and combination interventions on HbA1c in studies including patients with diabetes

| Author, year                                      | Baseline N | Baseline HbA1c, mean (SE), % | N at 12 months | HbA1c at 12 months, mean (SE), %  | Between-group difference in change from baseline at 12 months, % | Notes                                                                                                                                           |
|---------------------------------------------------|------------|------------------------------|----------------|-----------------------------------|------------------------------------------------------------------|-------------------------------------------------------------------------------------------------------------------------------------------------|
| <b>Self Management</b>                            |            |                              |                |                                   |                                                                  |                                                                                                                                                 |
| <b>Clark M, 2004<sup>5</sup></b>                  |            |                              |                |                                   |                                                                  |                                                                                                                                                 |
| Control                                           |            |                              |                |                                   |                                                                  |                                                                                                                                                 |
| Self management                                   |            |                              |                |                                   |                                                                  | No significant interaction between time and intervention for the combination of five laboratory measurements (cholesterol, HDL, LDL, TG, HbA1c) |
| <b>Plotnikoff, 2011<sup>8</sup></b>               |            |                              |                |                                   |                                                                  |                                                                                                                                                 |
| Diabetes education                                | 49         | 7.8 (2.0) <sup>a</sup>       | 49             | 7.2 (1.6) <sup>a</sup>            |                                                                  |                                                                                                                                                 |
| Diabetes education + physical activity supplement | 47         | 7.3 (1.3) <sup>a</sup>       | 47             | 7.2 (1.4) <sup>a</sup>            | +0.1 (P>0.05) versus diabetes education                          | Difference in adjusted change from baseline reported                                                                                            |
| <b>Diet</b>                                       |            |                              |                |                                   |                                                                  |                                                                                                                                                 |
| <b>Abraira, 1980<sup>1</sup></b>                  |            |                              |                |                                   |                                                                  |                                                                                                                                                 |
| <b>Razquin, 2009<sup>9</sup></b>                  |            |                              |                |                                   |                                                                  |                                                                                                                                                 |
| <b>Combination</b>                                |            |                              |                |                                   |                                                                  |                                                                                                                                                 |
| <b>Samaras K, 1997<sup>12</sup></b>               |            |                              |                |                                   |                                                                  |                                                                                                                                                 |
| Control                                           | 13         | 6.8 (0.6)                    | 13             | Change from baseline: 0.86 (0.27) |                                                                  |                                                                                                                                                 |
| Self management + physical activity               | 13         | 5.6 (0.3)                    | 13             | Change from baseline: 0.86 (0.29) | 0                                                                |                                                                                                                                                 |
| <b>Toobert D, 2011<sup>14b</sup></b>              |            |                              |                |                                   |                                                                  |                                                                                                                                                 |
| Usual Care                                        | 138        | 8.4 (0.02)                   | 138            | 7.8 (0.02)                        |                                                                  |                                                                                                                                                 |
| Self management + diet + physical activity        | 142        | 8.4 (0.03)                   | 142            | 8.4 (0.03)                        | 0.6% versus usual care                                           | No significant interaction between time and intervention in GEE model                                                                           |

<sup>a</sup> Standard deviation reported

<sup>b</sup> HbA1c at 24 months: Usual care, 7.8%; Self management + diet + physical activity, 8.4% (0.6% vs usual care)

**Table S6.** Effects of self management, diet, physical activity, and combination interventions on blood pressure

| Author, year                                      | Baseline N | Baseline BP, mean (SD), mmHg  | N at 12 months | BP at 12 months, mean (SD), mmHg        | Between-group difference in change from baseline at 12 months (95% CI), mmHg | BP at 36 months, mean (SD), mmHg | Between-group difference in change from baseline at 36 months (95% CI), mmHg |
|---------------------------------------------------|------------|-------------------------------|----------------|-----------------------------------------|------------------------------------------------------------------------------|----------------------------------|------------------------------------------------------------------------------|
| <b><i>Self Management</i></b>                     |            |                               |                |                                         |                                                                              |                                  |                                                                              |
| <b>Clark, 2004<sup>5a</sup></b>                   |            |                               |                |                                         |                                                                              |                                  |                                                                              |
| <b>Plotnikoff, 2011<sup>8</sup></b>               |            |                               |                |                                         |                                                                              |                                  |                                                                              |
| Diabetes education                                | 49         | SBP: 134.0 (16.1)             | 49             | SBP: -9.3 (-12.9 to -5.6) <sup>b</sup>  |                                                                              |                                  |                                                                              |
|                                                   |            | DBP: 76.4 (9.3)               |                | DBP: -4.4 (-7.2 to -1.6) <sup>b</sup>   |                                                                              |                                  |                                                                              |
| Diabetes education + physical activity supplement | 47         | SBP: 134.0 (17.6)             | 47             | SBP: -10.9 (-14.7 to -7.1) <sup>b</sup> | -1.6; P>0.05 versus diabetes education                                       |                                  |                                                                              |
|                                                   |            | DBP: 76.5 (9.5)               |                | DBP: -5.6 (-8.6 to -2.7) <sup>b</sup>   | -1.2; P>0.05 versus diabetes education                                       |                                  |                                                                              |
| <b><i>Diet</i></b>                                |            |                               |                |                                         |                                                                              |                                  |                                                                              |
| <b>Abraira, 1980<sup>1a</sup></b>                 |            |                               |                |                                         |                                                                              |                                  |                                                                              |
| <b>Zazpe, 2008<sup>11a</sup></b>                  |            |                               |                |                                         |                                                                              |                                  |                                                                              |
| <b><i>Physical Activity Interventions</i></b>     |            |                               |                |                                         |                                                                              |                                  |                                                                              |
| <b>Yates, 2010<sup>15a</sup></b>                  |            |                               |                |                                         |                                                                              |                                  |                                                                              |
| <b>Anderssen, 1995<sup>2</sup></b>                |            |                               |                |                                         |                                                                              |                                  |                                                                              |
| Control                                           | 43         | SBP: 128.7 (1.5) <sup>c</sup> | 43             | SBP: -0.5 (1.7) <sup>c</sup>            |                                                                              |                                  |                                                                              |
|                                                   |            | DBP: 87.0 (1.1) <sup>c</sup>  |                | DBP: -0.7 (1.3) <sup>c</sup>            |                                                                              |                                  |                                                                              |
| Exercise                                          | 49         | SBP: 132.1 (1.6) <sup>c</sup> | 49             | SBP: -2.2 (1.1) <sup>c</sup>            | -1.7 (P>0.05) versus control                                                 |                                  |                                                                              |
|                                                   |            | DBP: 89.2 (1.1) <sup>c</sup>  |                | DBP: -2.7 (1.0) <sup>c</sup>            | -2.0 (P>0.05) versus control                                                 |                                  |                                                                              |

| <b>Combination</b>                            |     |                      |    |                                |                       |  |
|-----------------------------------------------|-----|----------------------|----|--------------------------------|-----------------------|--|
| <b>Toobert, 2011</b> <sup>14 a</sup>          |     |                      |    |                                |                       |  |
| <b>Samaras, 1997</b> <sup>12 a</sup>          |     |                      |    |                                |                       |  |
| <b>Babazono, 2007</b> <sup>4</sup>            |     |                      |    |                                |                       |  |
| Control                                       | 41  | SBP: 132.0<br>(17.8) | 41 | SBP: 123.3 (15.2)              |                       |  |
|                                               |     | DBP: 79.3 (11.8)     |    | DBP: 75.0 (10.2)               |                       |  |
| Self management +<br>diet + physical activity | 46  | SBP: 127.6<br>(15.7) | 46 | SBP: 122.1 (16.3) <sup>d</sup> |                       |  |
|                                               |     | DBP: 78.2 (9.0)      |    | DBP: 74.5 (10.2) <sup>d</sup>  | 0.6 versus control    |  |
| <b>Stefanick ML, 1998</b> <sup>13</sup>       |     |                      |    |                                |                       |  |
| <b>Men</b>                                    |     |                      |    |                                |                       |  |
| <b>All men</b>                                | 190 | SBP: 114.3<br>(11.4) |    |                                |                       |  |
|                                               |     | DBP: 76.1 (7.4)      |    |                                |                       |  |
| Control                                       | 46  |                      | 46 | SBP: 0.3 (7.9) <sup>e</sup>    |                       |  |
|                                               |     |                      |    | DBP: 1.8 (6.1) <sup>e</sup>    |                       |  |
| Diet                                          | 49  |                      | 49 | SBP: -1.7 (6.4) <sup>e</sup>   |                       |  |
|                                               |     |                      |    | DBP: -0.3 (5.2) <sup>e</sup>   |                       |  |
| Physical activity                             | 47  |                      | 47 | SBP: -0.6 (7.3) <sup>e</sup>   |                       |  |
|                                               |     |                      |    | DBP: -1.1 (7.1) <sup>e</sup>   |                       |  |
| Diet + physical activity                      | 48  |                      | 48 | SBP: -3.0 (6.8) <sup>ef</sup>  | P<0.01 versus control |  |
|                                               |     |                      |    | DBP: -3.0 (6.6) <sup>eg</sup>  | P<0.01 versus control |  |
| <b>Women</b>                                  |     |                      |    |                                |                       |  |
| <b>All women</b>                              | 177 | SBP: 115.5<br>(12.8) |    |                                |                       |  |
|                                               |     | DBP: 73.2 (7.4)      |    |                                |                       |  |
| Control                                       | 45  |                      | 45 | SBP: -2.4 (7.6) <sup>e</sup>   |                       |  |
|                                               |     |                      |    | DBP: -0.6 (5.9) <sup>e</sup>   |                       |  |
| Diet                                          | 46  |                      | 46 | SBP: -3.5 (9.2) <sup>e</sup>   |                       |  |
|                                               |     |                      |    | DBP: -1.9 (5.0) <sup>e</sup>   |                       |  |
| Physical activity                             | 43  |                      | 43 | SBP: -1.1 (8.9) <sup>e</sup>   |                       |  |
|                                               |     |                      |    | DBP: -1.4 (5.9) <sup>e</sup>   |                       |  |
| Diet + physical activity                      | 43  |                      | 43 | SBP: -3.1 (8.4) <sup>eh</sup>  |                       |  |
|                                               |     |                      |    | DBP: -2.7 (4.6) <sup>ei</sup>  |                       |  |

| <b>Kumanyika SK, 2005<sup>7</sup></b>   |    |                 |    |                |                                            |                              |                                    |
|-----------------------------------------|----|-----------------|----|----------------|--------------------------------------------|------------------------------|------------------------------------|
| Usual Care                              |    |                 |    |                |                                            | SBP: 0.6 (8.5) <sup>e</sup>  |                                    |
|                                         |    |                 |    |                |                                            | DBP: -2.4 (7.0) <sup>e</sup> |                                    |
| Self management + Diet                  |    |                 |    |                |                                            | SBP: -0.7 (9.0) <sup>e</sup> | SBP: -1.35 (P=0.0165) <sup>j</sup> |
|                                         |    |                 |    |                |                                            | DBP: -3.0 (6.5) <sup>e</sup> | DBP: -0.61 (P=0.16) <sup>j</sup>   |
| <b>Gram B, 2010<sup>6</sup></b>         |    |                 |    |                |                                            |                              |                                    |
| Control                                 | 22 | SBP: 152 (18.3) | 20 | SBP: 145 (5.0) |                                            |                              |                                    |
|                                         |    | DBP: 89 (10.7)  |    | DBP: 88 (2.0)  |                                            |                              |                                    |
| Self management + Nordic walking        | 22 | SBP: 153 (25.1) | 21 | SBP: 148 (5.0) | SBP: 1.39 (-11.14 to 13.93) versus control |                              |                                    |
|                                         |    | DBP: 88 (11.2)  |    | DBP: 84 (2.0)  | DBP: -3.95 (-8.73 to 0.83) versus control  |                              |                                    |
| Self management + exercise prescription | 24 | SBP: 152 (19.4) | 24 | SBP: 142 (3.0) | SBP: -3.73 (-14.54 to 7.08) versus control |                              |                                    |
|                                         |    | DBP: 85 (10)    |    | DBP: 83 (2.2)  | DBP: -4.23 (-9.64 to 1.17)                 |                              |                                    |

<sup>a</sup> Blood pressure not reported

<sup>b</sup> Adjusted value at 12 months - baseline

<sup>c</sup> Standard error reported

<sup>d</sup> Statistical significance of between-group difference in SBP and DBP not reported

<sup>e</sup> Change from baseline reported

<sup>f</sup> P=0.13 for overall difference in SBP between groups from analysis of variance

<sup>g</sup> P=0.003 for overall difference in DBP between groups from analysis of variance

<sup>h</sup> P=0.59 for overall difference in SBP between groups from analysis of variance

<sup>i</sup> P=0.33 for overall difference in DBP between groups from analysis of variance

<sup>j</sup> Adjustment for baseline variables: ethnicity, gender, age, BP, BMI, sodium excretion

**Table S7.** Effects of self management, diet, physical activity, and combination interventions on blood pressure in race-sex subgroups

| Author, year                        | N   | Baseline BP                                             | Change in BP at 36 months                                                                              | Between-group difference in BP change at 36 mo                                          |
|-------------------------------------|-----|---------------------------------------------------------|--------------------------------------------------------------------------------------------------------|-----------------------------------------------------------------------------------------|
| <b>Kumanyika, 2005 <sup>7</sup></b> |     |                                                         |                                                                                                        |                                                                                         |
| <b>White Men</b>                    |     |                                                         |                                                                                                        |                                                                                         |
| Usual care                          | 345 | Mean SBP (SD): 127.1 (6.3)<br>Mean DBP (SD): 85.9 (1.9) | Mean change in SBP from baseline (SD): -0.3 (7.8)<br>Mean change in DBP from baseline (SD): -2.7 (7.7) | Reference                                                                               |
| Diet                                | 336 | Mean SBP (SD): 127.2 (6.5)<br>Mean DBP (SD): 86.2 (2.0) | Mean SBP (SD): -1.3 (8.5)<br>Mean DBP (SD): -3.0 (6.2)                                                 | Mean SBP (95% CI): -1.1 (-2.4 to 0.2)<br>Mean DBP (95% CI): -0.3 (-1.4 to 0.8)          |
| <b>Black Men</b>                    |     |                                                         |                                                                                                        |                                                                                         |
| Usual care                          | 47  | Mean SBP (SD): 126.2 (6.6)<br>Mean DBP (SD): 85.7 (1.9) | Mean change in SBP from baseline (SD): 1.7 (7.4)<br>Mean change in DBP from baseline (SD): -1.9 (7.0)  | Reference                                                                               |
| Diet                                | 39  | Mean SBP (SD): 128.0 (6.1)<br>Mean DBP (SD): 86.2 (2.0) | Mean SBP (SD): 2.2 (10.3)<br>Mean DBP (SD): -0.6 (8.1)                                                 | Mean SBP (95% CI): 0.5 (-3.8 to 4.9)<br>Mean DBP (95% CI): 1.4 (-2.2 to 4.9)            |
| <b>White Women</b>                  |     |                                                         |                                                                                                        |                                                                                         |
| Usual care                          | 129 | Mean SBP (SD): 127.8 (6.5)<br>Mean DBP (SD): 85.7 (1.9) | Mean change in SBP from baseline (SD): 2.1 (10.4)<br>Mean change in DBP from baseline (SD): -1.9 (6.8) | Reference                                                                               |
| Diet                                | 129 | Mean SBP (SD): 128.2 (6.9)<br>Mean DBP (SD): 85.8 (1.9) | Mean SBP (SD): 0.5 (8.9)<br>Mean DBP (SD): -3.4 (5.8)                                                  | Mean SBP (95% CI): -1.5 (-4.0 to 0.9)<br>Mean DBP (95% CI): -1.4 (-3.1 to 0.2)          |
| <b>Black Women</b>                  |     |                                                         |                                                                                                        |                                                                                         |
| Usual care                          | 56  | Mean SBP (SD): 128.0 (6.6)<br>Mean DBP (SD): 85.7 (2.0) | Mean change in SBP from baseline (SD): 2.0 (9.2)<br>Mean change in DBP from baseline (SD): -1.6 (7.5)  | Reference                                                                               |
| Diet                                | 61  | Mean SBP (SD): 129.0 (6.8)<br>Mean DBP (SD): 86.0 (1.8) | Mean SBP (SD): -1.0 (11.1)<br>Mean DBP (SD): -4.0 (8.2)                                                | 36 mo<br>Mean SBP (95% CI): -3.0 (-7.2 to 1.3)<br>Mean DBP (95% CI): -2.4 (-5.7 to 0.8) |

**Table S8.** Effects of self management, diet, physical activity, and combination interventions on LDL and HDL cholesterol

| Author, year                                      | Baseline N | Baseline cholesterol, mean (SD), mg/dl                        | N at 12 months | 12 months, mean (SD), mg/dl                                                   | Between-group difference in change from baseline at 12 months (95% CI), mg/dl |
|---------------------------------------------------|------------|---------------------------------------------------------------|----------------|-------------------------------------------------------------------------------|-------------------------------------------------------------------------------|
| <b>Self Management</b>                            |            |                                                               |                |                                                                               |                                                                               |
| Clark M, 2004 <sup>5a</sup>                       |            |                                                               |                |                                                                               |                                                                               |
| Plotnikoff RC, 2011 <sup>8</sup>                  |            |                                                               |                |                                                                               |                                                                               |
| Diabetes education                                | 49         | LDL: 112 (1.7)<br>HDL: 46.3 (11.6)                            | 49             | LDL: -15.4 (-27.0 to -7.7) <sup>b</sup><br>HDL: 3.9 (0.0 to 7.7) <sup>b</sup> |                                                                               |
| Diabetes education + physical activity supplement | 47         | LDL: 104.2 (46.3)<br>HDL: 42.5 (11.6)                         | 47             | LDL: -15.4 (-27.0 to -7.7) <sup>b</sup><br>HDL: 3.9 (3.9 to 7.7) <sup>b</sup> | P>0.05 versus diabetes education<br>P>0.05 versus diabetes education          |
| <b>Diet</b>                                       |            |                                                               |                |                                                                               |                                                                               |
| Abraira C, 1980 <sup>1c</sup>                     |            |                                                               |                |                                                                               |                                                                               |
| Zazpe I, 2008 <sup>11c</sup>                      |            |                                                               |                |                                                                               |                                                                               |
| <b>Physical Activity Interventions</b>            |            |                                                               |                |                                                                               |                                                                               |
| Yates T, 2010 <sup>15</sup>                       |            |                                                               |                |                                                                               |                                                                               |
| Control                                           | 26         | HDL: 50.2 [42.5 to 54.0] <sup>d</sup>                         | 26             | HDL: 0.0 (-3.9 to 3.9) <sup>e</sup>                                           |                                                                               |
| Exercise                                          | 24         | HDL: 50.2 [42.5 to 57.9]                                      | 24             | HDL: 0.0 (-30.9 to 30.9)                                                      | HDL: -0.0 (-3.9 to 3.9); P= 0.808                                             |
| Exercise + pedometer                              | 24         | HDL: 46.3 [42.5 to 54.0]                                      | 24             | HDL: 0.0 (-3.9 to 3.9)                                                        | HDL: -0.0 (-3.9 to 3.9); P=0.569                                              |
| <b>Anderssen, 1995<sup>2</sup></b>                |            |                                                               |                |                                                                               |                                                                               |
| Control                                           | 43         | LDL: 176.4 (5.0) <sup>f</sup><br>HDL: 40.2 (1.2) <sup>f</sup> | 43             | LDL: -8.5 (3.5) <sup>f</sup><br>HDL: 0.6 (0.6) <sup>f</sup>                   |                                                                               |
| Exercise                                          | 49         | LDL: 162.9 (3.9) <sup>f</sup><br>HDL: 39.0 (0.8) <sup>f</sup> | 49             | LDL: -5.0 (2.7) <sup>f</sup><br>HDL: 1.5 (0.8) <sup>f</sup>                   | P>0.05 versus control<br>P>0.05 versus control                                |
| <b>Combination</b>                                |            |                                                               |                |                                                                               |                                                                               |
| Toobert, 2011 <sup>14c</sup>                      |            |                                                               |                |                                                                               |                                                                               |
| Samaras K, 1997 <sup>12</sup>                     |            |                                                               |                |                                                                               |                                                                               |

|                                            |     |                              |    |                                 |                                              |
|--------------------------------------------|-----|------------------------------|----|---------------------------------|----------------------------------------------|
| Control                                    | 13  | HDL: 42.5 (3.9) <sup>f</sup> | 13 | HDL: -2.7 (1.5) <sup>hf</sup>   |                                              |
| Self management + physical activity        | 13  | HDL: 42.5(3.9) <sup>f</sup>  | 13 | HDL: -0.4 (1.5) <sup>hf</sup>   |                                              |
| <b>Babazono A, 2007<sup>4</sup></b>        |     |                              |    |                                 |                                              |
| Control                                    | 41  | LDL: 123.8. (28.2)           | 41 | LDL: 123.9 (26.6)               |                                              |
|                                            |     | HDL: 55.7 (12.9)             |    | HDL: 56.5 (15.6)                |                                              |
| Self management + diet + physical activity | 46  | LDL: 121.0 (29.2)            | 46 | LDL: 119.6 (28.0) <sup>g</sup>  |                                              |
|                                            |     | HDL: 54.5 (13.4)             |    | HDL: 56.7 (14.2) <sup>g</sup>   |                                              |
| <b>Stefanick ML, 1998<sup>13</sup></b>     |     |                              |    |                                 |                                              |
| <b>Men</b>                                 |     |                              |    |                                 |                                              |
| <b>All men</b>                             | 190 | LDL: 155.8 (14.2)            |    |                                 |                                              |
|                                            |     | HDL: 35.8 (4.4)              |    |                                 |                                              |
| Control                                    | 46  |                              | 46 | LDL: -4.6 (21.1) <sup>h</sup>   |                                              |
|                                            |     |                              |    | HDL: -0.2 (4.3) <sup>h</sup>    |                                              |
| Diet                                       | 49  |                              | 49 | LDL: -10.8 (18.8) <sup>h</sup>  |                                              |
|                                            |     |                              |    | HDL: -0.8 (4.4) <sup>h</sup>    |                                              |
| Physical activity                          | 47  |                              | 47 | LDL: -3.6 (18.8) <sup>h</sup>   |                                              |
|                                            |     |                              |    | HDL: 1.2 (4.4) <sup>h</sup>     |                                              |
| Diet + physical activity                   | 48  |                              | 48 | LDL: -20.0 (17.3) <sup>hi</sup> | P<0.001 versus control and physical activity |
|                                            |     |                              |    | HDL: 0.4 (5.3) <sup>hj</sup>    |                                              |
| <b>Women</b>                               |     |                              |    |                                 |                                              |
| <b>All women</b>                           | 177 | LDL: 160.7 (18.4)            |    |                                 |                                              |
|                                            |     | HDL: 47.0 (6.7)              |    |                                 |                                              |
| Control                                    | 45  |                              | 45 | HDL: -2.5 (16.6) <sup>h</sup>   |                                              |
|                                            |     |                              |    | LDL: 1.0 (6.1) <sup>h</sup>     |                                              |
| Diet                                       | 46  |                              | 46 | LDL: -7.3 (18.9) <sup>h</sup>   |                                              |
|                                            |     |                              |    | HDL: 0.3 (6.0) <sup>h</sup>     |                                              |
| Physical activity                          | 43  |                              | 43 | LDL: -5.6 (19.4) <sup>h</sup>   |                                              |
|                                            |     |                              |    | HDL: 2.3 (6.7) <sup>h</sup>     |                                              |
| Diet + physical activity                   | 43  |                              | 43 | LDL: -14.5 (22.2) <sup>hk</sup> | P<0.05 versus control                        |
|                                            |     |                              |    | HDL: -1.1 (6.4) <sup>hl</sup>   |                                              |
| <b>Kumanyika SK, 2005<sup>7c</sup></b>     |     |                              |    |                                 |                                              |



| Gram B, 2010 <sup>6</sup>               |    |                   |    |                                |                                                       |
|-----------------------------------------|----|-------------------|----|--------------------------------|-------------------------------------------------------|
| Control                                 | 22 | LDL: 98.8 (25.87) | 20 | LDL: 100.4 (19.3) <sup>f</sup> |                                                       |
|                                         |    | HDL: 42.5 (14.3)  |    | HDL: 92.7 (7.7) <sup>f</sup>   |                                                       |
| Self management + Nordic walking        | 22 | LDL: 98.8 (32.8)  | 21 | LDL: 69.5 (7.7) <sup>f</sup>   | LDL: -15.8 (-39.4 to 7.7) versus control <sup>m</sup> |
|                                         |    | HDL: 42.5 (11.2)  |    | HDL: 88.8 (7.7) <sup>f</sup>   | HDL: -6.2 (-22.4 to 10.4) versus control              |
| Self management + exercise prescription | 24 | LDL: 99.2 (23.6)  | 24 | LDL: 100.4 (15.4) <sup>f</sup> | LDL: 12.0 (-23.2 to 46.7) versus control              |
|                                         |    | HDL: 44.8 (16.6)  |    | HDL: 104.2 (7.7) <sup>f</sup>  | HDL: 7.3 (-5.0 to 26.6) versus control                |

<sup>a</sup> No significant interaction between time and intervention for the combination of five laboratory measurements (cholesterol, HDL, LDL, TG, HbA1c)

<sup>b</sup> Adjusted value at 12 months - baseline

<sup>c</sup> LDL and HDL cholesterol not reported

<sup>d</sup> Median [interquartile range]

<sup>e</sup> Mean change from baseline (95% confidence interval)

<sup>f</sup> Standard error reported

<sup>g</sup> Statistical significance of between-group difference in SBP and DBP not reported

<sup>h</sup> Change from baseline reported

<sup>i</sup> P<0.001 for overall difference in LDL between groups from analysis of variance

<sup>j</sup> P=0.21 for overall difference in HDL between groups from analysis of variance

<sup>k</sup> P=0.03 for overall difference in LDL between groups from analysis of variance

<sup>l</sup> P=0.09 for overall difference in HDL between groups from analysis of variance

<sup>m</sup> Adjusted for baseline value of LDL or HDL

## References

1. Abraira C, de Bartolo M, Myscowski JW. Comparison of unmeasured versus exchange diabetic diets in lean adults. Body weight and feeding patterns in a 2-year prospective pilot study. *Am J Clin Nutr*. May 1980;33(5):1064-1070.
2. Anderssen SA, Haaland, A., Hjermann, I., Urdal, P., Gjesdal, K., Holme, I. Oslo Diet and Exercise Study: a one-year randomized intervention trial. Effect on hemostatic variables and other coronary risk factors. *Nutr Metab Cardiovasc Dis*. 1995;5:189-200.
3. Torjesen PA, Birkeland KI, Anderssen SA, Hjermann I, Holme I, Urdal P. Lifestyle changes may reverse development of the insulin resistance syndrome. The Oslo Diet and Exercise Study: a randomized trial. *Diabetes care*. Jan 1997;20(1):26-31.
4. Babazono A, Kame, C., Ishihara, R., Yamamoto, E., Hillman, A.L. Patient-motivated prevention of lifestyle-related disease in Japan. *Dis Manage Health Outcomes*. 2007;15(2):119-126.
5. Clark M, Hampson SE, Avery L, Simpson R. Effects of a tailored lifestyle self-management intervention in patients with type 2 diabetes. *Br J Health Psychol*. Sep 2004;9(Pt 3):365-379.
6. Gram B, Christensen R, Christiansen C, Gram J. Effects of nordic walking and exercise in type 2 diabetes mellitus: a randomized controlled trial. *Clin J Sport Med*. Sep 2010;20(5):355-361.
7. Kumanyika SK, Cook NR, Cutler JA, et al. Sodium reduction for hypertension prevention in overweight adults: further results from the Trials of Hypertension Prevention Phase II. *J Hum Hypertens*. Jan 2005;19(1):33-45.
8. Plotnikoff RC, Pickering MA, Glenn N, et al. The effects of a supplemental, theory-based physical activity counseling intervention for adults with type 2 diabetes. *J Phys Act Health*. Sep 2011;8(7):944-954.
9. Razquin C, Martinez JA, Martinez-Gonzalez MA, Mitjavila MT, Estruch R, Marti A. A 3 years follow-up of a Mediterranean diet rich in virgin olive oil is associated with high plasma antioxidant capacity and reduced body weight gain. *Eur J Clin Nutr*. Dec 2009;63(12):1387-1393.
10. Razquin C, Martinez JA, Martinez-Gonzalez MA, Fernandez-Crehuet J, Santos JM, Marti A. A Mediterranean diet rich in virgin olive oil may reverse the effects of the -174G/C IL6 gene variant on 3-year body weight change. *Mol Nutr Food Res*. May 2010;54 Suppl 1:S75-82.
11. Zazpe I, Sanchez-Tainta A, Estruch R, et al. A large randomized individual and group intervention conducted by registered dietitians increased adherence to Mediterranean-type diets: the PREDIMED study. *J Am Diet Assoc*. Jul 2008;108(7):1134-1144; discussion 1145.
12. Samaras K, Ashwell S, Mackintosh AM, Fleury AC, Campbell LV, Chisholm DJ. Will older sedentary people with non-insulin-dependent diabetes mellitus start exercising? A health promotion model. *Diabetes Res Clin Pract*. Aug 1997;37(2):121-128.
13. Stefanick ML, Mackey S, Sheehan M, Ellsworth N, Haskell WL, Wood PD. Effects of diet and exercise in men and postmenopausal women with low levels of HDL cholesterol and high levels of LDL cholesterol. *N Engl J Med*. Jul 2 1998;339(1):12-20.
14. Toobert DJ, Strycker LA, King DK, Barrera M, Jr., Osuna D, Glasgow RE. Long-term outcomes from a multiple-risk-factor diabetes trial for Latinas: inverted exclamation mark Viva Bien! *Transl Behav Med*. Sep 2011;1(3):416-426.
15. Yates T, Davies MJ, Gorely T, et al. The effect of increased ambulatory activity on markers of chronic low-grade inflammation: evidence from the PREPARE programme randomized controlled trial. *Diabet Med*. Nov 2010;27(11):1256-1263.
16. Aggarwal A, Freund K, Sato A, et al. Are depressive symptoms associated with cancer screening and cancer stage at diagnosis among postmenopausal women? The Women's Health Initiative Observational Cohort. *Journal of Women's Health (15409996)*. 2008;17(8):1353-1361.

17. The Diabetes Prevention Program. Design and methods for a clinical trial in the prevention of type 2 diabetes. *Diabetes care*. Apr 1999;22(4):623-634.
